# Supplementary material for: Efficient synthesis of cyclic carbonates from CO2under ambient conditions over Zn(betaine)2Br2: experimental and theoretical studies
Source: Royal Society of Chemistry journal article supplement (doi:10.1039/d1cp05553d), 2022-01-01
Supplement: d1cp05553d2.pdf [file d1cp05553d2.pdf]

## Supporting information

### Efficient synthesis of cyclic carbonates from CO<sub>2</sub> under ambient condition over

### Zn(betaine)<sub>2</sub>Br<sub>2</sub>: experimental and theoretical study

Jun Ma,\* Yahui Wu, Xupeng Yan, Chunjun Chen, Tianbin Wu, Honglei Fan, Zhimin Liu, Buxing Han\*

E-mail: majun@iccas.ac.cn; hanbx@iccas.ac.cn

#### 1. Materials

Zinc bromide (98%), n-butanol (99.5%) and styrene oxide (98%) were provided by Beijing InnoChem Science & Technology Co., Ltd. Cyclohexene oxide (98%), epibromohydrin (97%), epichlorohydrin (99%) were purchased from J&K Scientific Ltd. Betaine (98%), 1,2-epoxypropane (analytical pure) and Tetrabutylammonium bromide (TBAB, >98.0%) were obtained from China National Pharmaceutical Group Corporation. Absolute alcohol was analytical grade and purchased from Tianjin Concord Technology Co., Ltd. Glycidyl phenyl ether (99.0%) and 1,2-epoxy-5-hexene (96.0%) were obtained from TCI (Shanghai) Development Co., Ltd. Propylene carbonate (99.0%) and 1,2-epoxyhexane were provided by Alfa Aesar. All the chemicals were used without further purification. CO<sub>2</sub> was purchased from Beijing Analytical Instrument Factory with a purity of 99.99%. The ionic liquid (IL) 1-hexyl-3-methylimidazolium tetrafluoroborate (98%) was supplied by Lanzhou Institute of Chemical Physics; Chinese Academy of Sciences. The IL was used without further purification.

#### 2. Preparation of catalyst Zn(betaine)<sub>2</sub>Br<sub>2</sub>

In the experiments, 10 mmol betaine and 100 mL absolute ethanol were added into a 250 mL round bottom flask in turn. After the betaine was completely dissolved by magnetic stirring, it was labeled as Solvent A. 10 mmol ZnBr<sub>2</sub> and 50 mL absolute ethanol were added into a 100 mL round bottom flask in turn. After the ZnBr<sub>2</sub> was completely dissolved, it was dropped into Solution A, and white precipitate was formed. After magnetic stirring for two hours at room temperature, the white precipitates were separated by filtration. Washing with 25 mL absolute ethanol for three times, and then vacuum dry at 60 °C for 12 hours to remove the residual absolute ethanol. Finally, a white precipitate with more than 99% purity was obtained as target product. Spectral characterizations and elemental analyses of the catalyst Zn(betaine)<sub>2</sub>Br<sub>2</sub> were obtained as follows.

#### 3. Reactions

Reactions were carried out in a 22 mL stainless-steel batch reactor equipped with a magnetic stirrer. In a typical experiment, Zn(betaine)<sub>2</sub>Br<sub>2</sub> (0.1 mmol) and PO (20 mmol) were added into the reactor. After sealing and preheating in a constant-temperature oil bath (or water bath) at a desired temperature for 20 minutes, CO<sub>2</sub> was charged into the reactor until the desired pressure was reached. During the reaction, the reactor was continuously magnetically stirred. After the reaction, the reactor was placed into ice water for 10 min, and then the excess CO<sub>2</sub> was released slowly. After depressurization, n-butanol was added into the liquid phase as an internal standard for the quantitative analysis. The reactor was flushed by 2 mL absolute ethanol (or ethyl acetate). After centrifugation, the products were analyzed quantitatively by a gas chromatograph (Agilent 6820) equipped with a flame ionization detector and a capillary column (HP-INNOWAX).

For the experiments near the atmospheric pressure, the air in the reactor was replaced by atmospheric CO<sub>2</sub> for three times and the reactions were carried out in a 25 mL round bottom flask equipped with a magnetic stirrer.

Then the pressure of CO<sub>2</sub> was kept at near the atmospheric pressure (0.1 MPa) using a balloon with CO<sub>2</sub>. For the experiment of adding solvent, such as PC or IL, the solvent and reactant can be added successively.

TON was calculated as (TON = mmol product/mmol catalyst; TOF = mmol product/mmol catalyst per h).

#### 4. Structure characterization of catalyst and products

The structures and purity of the Zn(betaine)<sub>2</sub>Br<sub>2</sub> were characterized by NMR and elemental analysis techniques. A Bruker AV400 (400 MHz) NMR spectrometer was utilized with DMSO-*d*<sub>6</sub> as the solvent. Chemical shifts ( $\delta$ ) were reported in parts per million (ppm) and referenced to the residual solvent peaks. Elemental analyses for C, H and N were carried out with a Flash EA 1112 elemental analyzer. The Zn in the complex was determined by induced coupled plasma optical emission spectrometer (ICP-OES). The Fourier transform infrared (FT-IR) spectra were collected at a resolution of 4 cm<sup>-1</sup> on a Bruker Vector 27 spectrophotometer in the 400–4000cm<sup>-1</sup> region. The IR spectra of the samples were measured by the conventional KBr pellet method (Figure S2).

**Betaine:** <sup>13</sup>C NMR (400 MHz, DMSO-*d*<sub>6</sub>)  $\delta$  = 164.29, 66.86, 52.86;

<sup>1</sup>H NMR (400 MHz, DMSO-*d*<sub>6</sub>)  $\delta$  = 3.13, 3.52.

**Zn(betaine)<sub>2</sub>Br<sub>2</sub>:** <sup>13</sup>C NMR (400 MHz, DMSO-*d*<sub>6</sub>)  $\delta$  = 166.42, 65.86, 52.49.

<sup>1</sup>H NMR (400 MHz, DMSO-*d*<sub>6</sub>)  $\delta$  = 3.17, 3.87.

**Zn(betaine)<sub>2</sub>Br<sub>2</sub>:** Calcd Zn 14.23, C 26.14, H 4.83, N 6.09; Found Zn 13.34, C 26.41, H 4.91, N 6.09.

**4-chloromethyl-[1,3]dioxolan-2-one:** <sup>1</sup>H NMR (400 MHz, DMSO-*d*<sub>6</sub>)  $\delta$  = 5.13-5.09, 4.62-4.57, 4.30-4.25, 4.00-3.94. <sup>13</sup>C NMR (400 MHz, DMSO-*d*<sub>6</sub>)  $\delta$  = 154.97, 75.43, 67.36, 45.82.

#### 5. Computational Methods

All calculations were performed with the Gaussian 09 package.<sup>[1]</sup> DFT calculations were employed with M062x.<sup>[2]</sup> Pople-style basis sets<sup>[3]</sup> 6-31+G(d), 6-311+G(d,p) and 6-311++G(d,p) were used for C, H, O, N, Zn atoms, and the LANL2DZ basis set<sup>[4]</sup> was used for the Br. The calculation of the catalyst-A-E in Figure S2 were carried out in the gas. To evaluate the solvent effects of PO and PC, self-consistent reaction field (SCRf) calculations based on the conductor polarized continuum model<sup>[5]</sup> (CPCM) were performed, and diethyl ether parameters were adopted to a lack of accurate data of PO. The value of the dielectric constant ( $\epsilon=69$ ) of PC were employ to simulate PC as solvent, and the radius ( $a_0=3.96$ ) obtained by volume calculation. Intrinsic reaction coordinate (IRC) calculations at the 6-31+G(d) level (for C, H, O, N, Zn atoms) were performed to confirm that a given transition state (one imaginary frequency) connect a particular couple of consecutive minima (zero imaginary frequencies). Subsequently, geometry optimizations and frequency calculations were conducted at the 6-311+G(d,p) level (for C, H, O, N, Zn atoms) with 298.15 K and 1.00 atm to obtained the relative free energies (in kcal mol<sup>-1</sup>). Natural population analysis (NPA) and bond-order calculations were also performed. The wiberg bond indices and natural charges were analyzed using the NBO with SCRf calculations method at the 6-311++G(d,p) level for C, H, O, N, Zn atoms and the LANL2DZ basis set for the Br.

[1] Gaussian 09 (Revision A.01), M. J. Frisch, G. W. Trucks, H. B. Schlegel, G. E. Scuseria, M. A. Robb, J. R. Cheeseman, G. Scalmani, V. Barone, B. Mennucci, G. A. Petersson, H. Nakatsuji, M. Caricato, X. Li, H. P. Hratchian, A. F. Izmaylov, J. Bloino, G. Zheng, J. L. Sonnenberg, M. Hada, M. Ehara, K. Toyota, R. Fukuda, J. Hasegawa, M. Ishida, T. Nakajima, Y. Honda, O. Kitao, H. Nakai, T. Vreven, J. A. Montgomery, Jr., J. E. Peralta, F. Ogliaro, M. Bearpark, J. J. Heyd, E. Brothers, K. N. Kudin, V. N. Staroverov, R. Kobayashi, J. Normand, K. Raghavachari, A. Rendell, J. C. Burant, S. S. Iyengar, J. Tomasi, M. Cossi, N. Rega, J. M. Millam, M. Klene, J. E. Knox, J. B. Cross, V. Bakken, C. Adamo, J. Jaramillo, R. Gomperts, R. E. Stratmann, O. Yazyev, A. J. Austin, R. Cammi, C. Pomelli, J. W. Ochterski, R. L. Martin, K. Morokuma, V. G. Zakrzewski, G. A. Voth, P. Salvador,

J. J. Dannenberg, S. Dapprich, A. D. Daniels, Ö. Farkas, J. B. Foresman, J. V. Ortiz, J. Cioslowski, D. J. Fox, Gaussian, Inc., Wallingford, CT, **2013**.

- [2] a) Y. Zhao, D. G. Truhlar, *Acc. Chem. Res.* **2008**, 41,157–167; b) K. E. Riley, M. Pitonňák, J. Černý, P. Hobza, *J. Chem. Theory Comput.* **2010**, 6, 66–80; c) G.-J. Cheng, X. H. Zhang, L.W. Chung, L. P. Xu, Y.-D. Wu, *J. Am. Chem. Soc.* **2015**, 137,1706–1725; d) Z. Y. Lin, *Acc. Chem. Res.* 2010, 43, 602– 611; e) P. H. Y. Cheong, C. Y. Legault, J. M. Um, N. Çelebi-Ölçem, K. N. Houk, *Chem. Rev.* **2011**, 111, 5042–5137; f) A. Morgan, R. Kavanagh, W. F. Lin, C. Hardacre, P. Hu, *Phys. Chem. Chem. Phys.* **2013**, 15,20170– 20175; g) J.-X. Liang, X.-F. Yang, A. Wang, T. Zhang, J. Li, *Catal. Sci. Technol.* **2016**, 6, 6886–6892.
- [3] P. M. W. Gill, B. G. Johnson, J. A. Pople, M. Frisch, *J. Chem. Phys. Lett.* **1992**, 197, 499–505.
- [4] C. H. Huang, J. C. Dong, W. M. Sun, Z. J. Xue, J. Ma, L. R. Zheng, C. Liu, X. Li, K. Zhou, X. Z. Qiao, Q. Song, W. D. Ma, L. Zhang, Z. Y. Lin\*, T. W\*, *nature communications*, **2019**, 10:2779.
- [5] V. Barone, M. Cossi, *J. Phys. Chem. A*, **1998**, 102, 1995-2001.

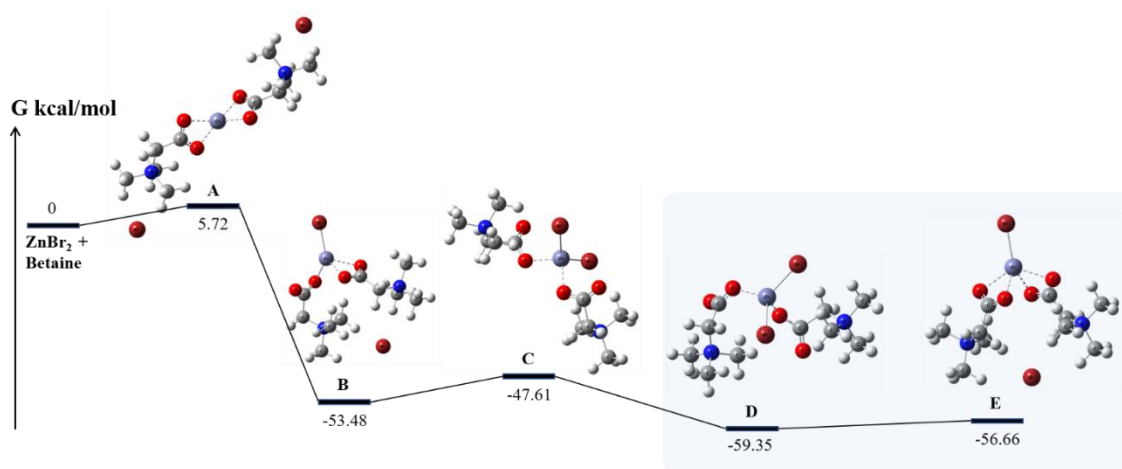

**Figure S1.** Relative free-energy profile of the Zn(betaine)<sub>2</sub>Br<sub>2</sub> with various possible geometries in gas.

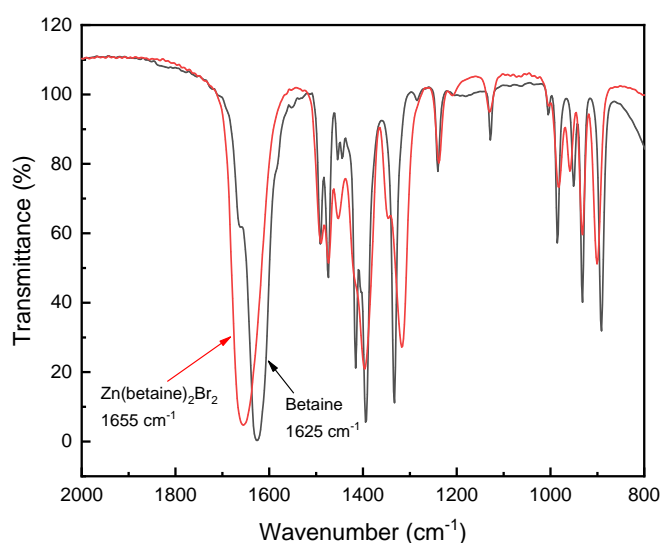

**Figure S2.** Fourier transform infrared (FT-IR) spectrums and the geometries of the catalyst and betaine.

**Table S1.** Comparison of catalytic activity of Zn(betaine)<sub>2</sub>Br<sub>2</sub> with recently developed various catalysts for the of the cycloaddition of CO<sub>2</sub> with epoxides.

| Entry           | Catalyst, [mol%]                                                                                        | T<br>[°C] | CO <sub>2</sub><br>Pressure | Epoxide<br>mmol | Time<br>hour | Con./Sel.<br>[%]                           | Ref.      |
|-----------------|---------------------------------------------------------------------------------------------------------|-----------|-----------------------------|-----------------|--------------|--------------------------------------------|-----------|
| 1 <sup>a</sup>  | ZnMOF-1/TBAB, 1.8 mol%                                                                                  | 40        | 10 bar                      | 10              | 3.5          | 99/99                                      | [6]       |
| 2 <sup>b</sup>  | (Γ)Meim-Uio-66, 0.52 mol%                                                                               | 120       | 1 atm                       | 10              | 24           | 100/93                                     | [7]       |
| 3 <sup>c</sup>  | Al(III)@cage, 0.33 mol%; TBAB, 10 mol%                                                                  | r.t.      | 1 atm                       | 1               | 48           | 58 <sup>d</sup> , 90 <sup>e</sup>          | [8]       |
| 4 <sup>f</sup>  | Zn/POF2, 2 wt%, TBAB, 2.5 mol%                                                                          | 90        | 2.5 bar                     | 17.2            | 9            | 92/86 <sup>g</sup><br>99/95 <sup>h</sup>   | [9]       |
| 5 <sup>i</sup>  | HPIL-7, 1.5 mol%                                                                                        | 120       | 1.5 MPa                     | 14.3            | 3            | 99/99 <sup>j</sup><br>95/99 <sup>k</sup>   | [10]      |
| 6 <sup>l</sup>  | SH <sub>4</sub> -Al(Cl) 0.25 mol%, [C <sub>1</sub> C <sub>6</sub> Im][HCO <sub>3</sub> ] 0.25 mol%      | 25        | 1.0 MPa                     | 20              | 24           | 99(94) <sup>m</sup><br>97(92) <sup>n</sup> | [11]      |
| 7               | (L <sub>1</sub> )AlMe <sub>2</sub> , 1.7 mol%; Bu <sub>4</sub> NI 1.7 mol%                              | 25        | 1 bar                       | —               | 48           | 85 <sup>o</sup>                            | [12]      |
|                 | L <sub>1</sub> H, ( <i>E</i> )- <i>N</i> -(2,6-diisopropylphenyl)- <i>N'</i> -(ferrocenyl)acetimidamide | 80        |                             |                 | 24           | 98 <sup>p</sup>                            |           |
| 8 <sup>q</sup>  | cobalt complexes, 0.2 mol%; TBAB 3 mmol%                                                                | 30        | 5 bar                       | 10              | 24           | 98                                         | [13]      |
| 9 <sup>r</sup>  | H <sub>3</sub> [Mn(T4CPP)], 0.02 mol%; TBAI, 1 mol%                                                     | 90        | 1 atm                       | 6.25            | 36           | > 99%                                      | [14]      |
| 10 <sup>s</sup> | CPP-IL0.05, 30 mg                                                                                       | 100       | 1 atm                       | 12.8            | 24           | 99/100                                     | [15]      |
| 11 <sup>t</sup> | Zn(II)-based coordination network with a ladder motif ADES-3/TBAB=2.0/2.5 mol %                         | 80        | 10 bar                      | 17.4            | 8            | 99                                         | [16]      |
| 12 <sup>u</sup> | [CoZn][(BDC)(DABCO) <sub>0.5</sub> ], 0.5 wt%                                                           | 100       | 3 MPa                       | 20.0 g          | 5            | 99/98                                      | [17]      |
| 13              | Zn(betaine) <sub>2</sub> Br <sub>2</sub> , 0.5 mol%                                                     | 110       | 2 MPa                       | 20 <sup>v</sup> | 1            | 99/100                                     | this work |
|                 | Zn(betaine) <sub>2</sub> Br <sub>2</sub> , 2 mol%                                                       | 40        | 2 MPa                       | 20 <sup>w</sup> | 7            | 99/99                                      |           |
|                 | Zn(betaine) <sub>2</sub> Br <sub>2</sub> , 2 mol%                                                       | 40        | 1 bar                       | 20 <sup>x</sup> | 24           | 98/99                                      |           |

<sup>a</sup> Reaction conditions: PO=10 mmol,  $p_{CO_2} = 10 \text{ bar}$ , 3.5 h, 40 °C, 600 rpm. Catalyst loading: ZnMOF-1=1.8 mol% (0.18 mmol, 0.082 g); TBAB=1.8 mol% (0.18 mmol, 0.058 g) reaction performed in a high-pressure reactor.

<sup>b</sup> Reaction conditions: epichlorohydrin (10 mmol), (Γ)Meim-Uio-66 (50 mg, 0.052 mmol), CO<sub>2</sub> (0.1 MPa), 393 K, t=24 h. Determined by GC-MS.

<sup>c</sup> Reaction conditions: 1 mmol epoxide, 0.33 mol% Al(III)@cage, 10 mol% TBAB, r.t., 1 atm CO<sub>2</sub>, and 48 h.

<sup>d</sup> Epoxide: PO, isolated yields of PC.

<sup>e</sup> Epoxide: epichlorohydrin, isolated yields of 4-chloromethyl-[1,3]dioxolan-2-one.

<sup>f</sup> Epoxide (17.2 mmol), TBAB (cocatalyst, 2.5 mol%, 0.43 mmol), catalyst (POF or Zn/POF: 2 wt%, 20 mg), CO<sub>2</sub> (2.5 bar), 90 °C and 9 h.

<sup>g</sup> Epoxide: PO, the conversion/isolated yield of PC.

<sup>h</sup> Epoxide: epichlorohydrin, the conversion/isolated yield of 4-chloromethyl-[1,3]dioxolan-2-one.

<sup>i</sup> Reaction conditions: Epoxides (14.3 mmol), HPIL-7 (1.5 mol% of epoxides), 120 °C, 1.5 MPa, 3 h.

<sup>j</sup> Epoxide: PO, the conversion/isolated yield of PC.

<sup>k</sup> Epoxide: epichlorohydrin, the conversion/isolated yield of 4-chloromethyl-[1,3]dioxolan-2-one.

<sup>l</sup> Reaction conditions: SH<sub>4</sub>-Al(Cl) 0.25 mol%, [C<sub>1</sub>C<sub>6</sub>Im][HCO<sub>3</sub>] 0.25 mol%, epoxide 20 mmol, CO<sub>2</sub> pressure 1.0 MPa, 25 °C, 24 h.

<sup>m</sup> Epoxide: PO, GC yield (isolated yield in parentheses) of cyclic carbonates.

<sup>n</sup> Epoxide: epichlorohydrin, GC yield (isolated yield in parentheses) of 4-chloromethyl-[1,3]dioxolan-2-one.

- o (L1)AlMe<sub>2</sub> (1.7 mol%), Bu<sub>4</sub>NI (1.7 mol%), 25 °C, CO<sub>2</sub> (1 bar, balloon), 48 h, isolated yield from purified PC.
- p (L1)AlMe<sub>2</sub> (1.7 mol%), Bu<sub>4</sub>NI (1.7 mol%), 80 °C, CO<sub>2</sub> (1 bar, balloon), 24 hour, isolated yield from purified 4-chloromethyl-[1,3]dioxolan-2-one.
- q PO (10.0 mmol), catalyst (0.02 mol, 0.2 mol %), TBAB (0.3 mmol, 3 mol %), no solvent, 30 °C,  $p_{CO_2} = 5 \text{ bar}$ , 24 h, yields were determined by GC using biphenyl as an internal standard.
- r Conditions: 0.02 mol% of H<sub>3</sub>[Mn(T4CPP)], (0.00125 mmol), 1 mol% of TBAI (0.0625 mmol), 6.25 mmol of epichlorohydrin, 90 °C, 1 atm of CO<sub>2</sub>, 36 h.
- s Reaction conditions: 2-(chloromethyl)oxirane (12.8 mmol), CPP-IL0.05 (30 mg), CO<sub>2</sub> (1.0 atm), 100 °C, 24 h.
- t Reaction conditions: epichlorohydrin=17.4 mmol, catalyst: ADES-3/TBAB=2.0/2.5 mol %;  $p_{CO_2} = 10 \text{ bar}$ , 8 h, and 80 °C; Yield determined by GC analysis.
- u Reaction conditions: catalyst ([CoZn][(BDC)(DABCO)<sub>0.5</sub>]) 0.5 wt% of epichlorohydrin, epichlorohydrin 20.0 g, CO<sub>2</sub> 3 MPa, 100 °C, 5 h.
- v Reaction condition: PO (20 mmol), Zn(betaine)<sub>2</sub>Br<sub>2</sub> (0.1 mmol, 0.5 mol%), without solvent;
- w PO, [HMIm][BF<sub>4</sub>] (as solvent, 0.5 g).
- x Epichlorohydrin, [HMIm][BF<sub>4</sub>] (as solvent, 0.5 g).

- [6] P. Patel, B. Parmar, R. I. Kureshy, N. Khan and E. Suresh, *ChemCatChem* **2018**, *10*, 2401–2408.
- [7] J. Liang, R.-P. Chen, X.-Y. Wang, T.-T. Liu, X.-S. Wang, Y.-B. Huang and R. Cao, *Chem. Sci.* **2017**, *8*, 1570–1575.
- [8] C. K. Ng, R. W. Toh, T. T. Lin, H.-K. Luo, T. S. A. Hor and J. Wu, *Chem. Sci.* **2019**, *10*, 1549–1554.
- [9] MD. W. Hussain, V. Bhardwaj, A. Giri, A. Chande and A. Patra, *Chem. Sci.* **2020**, *11*, 7910–7920.
- [10] H. Gou, X. Ma, Q. Su, L. Liu, T. Ying, W. Qian, L. Dong and W. Cheng, *Phys. Chem. Chem. Phys.* **2021**, *23*, 2005–2014.
- [11] J. Liu, G. Yang, Y. Liu, D. Zhang, X. Hu and Zhibing Zhang, *Green Chem.* **2020**, *22*, 4509–4515.
- [12] Y. R. Yepes, J. Martínez, H. R. Sánchez, C. Quintero, M. C. Ortega-Alfaro, J. G. López-Cortés, C. G. Daniliuc, A. Antiñolo, A. Ramos and R. S. Rojas, *Dalton Trans.* **2020**, *49*, 1124–1134.
- [13] W.-Y. Song, Q. L. Liu, Q. Q. Bu, D. H. Wei, B. Dai and N. Liu, *Organometallics* **2020**, *39*, 3546–3561.
- [14] B. N. Cabral, J. L. S. Milani, A. M. Meireles, D. C. S. Martins, S. L. S. Ribeiro, J. S. Rebouças, C. L. Donnicic and R. P. Chagas, *New J. Chem.* **2021**, *45*, 1934–1943.
- [15] C. Cui, R. Sa, Z. Hong, H. Zhong and R. Wan, *ChemSusChem*, **2020**, *13*, 180–187.
- [16] U. Patel, P. Patel, B. Parmar, A. Dadhania and E. Suresh, *Cryst. Growth Des.* **2021**, *21*, 1833–1542.
- [17] Y. F. Wu, X. H. Song, S. Q. Xu, Y. Chen, O. Oderinde, L. J. Gao, R. P. Wei and G. M. Xiao, *Dalton Trans.* **2020**, *49*, 312–321.

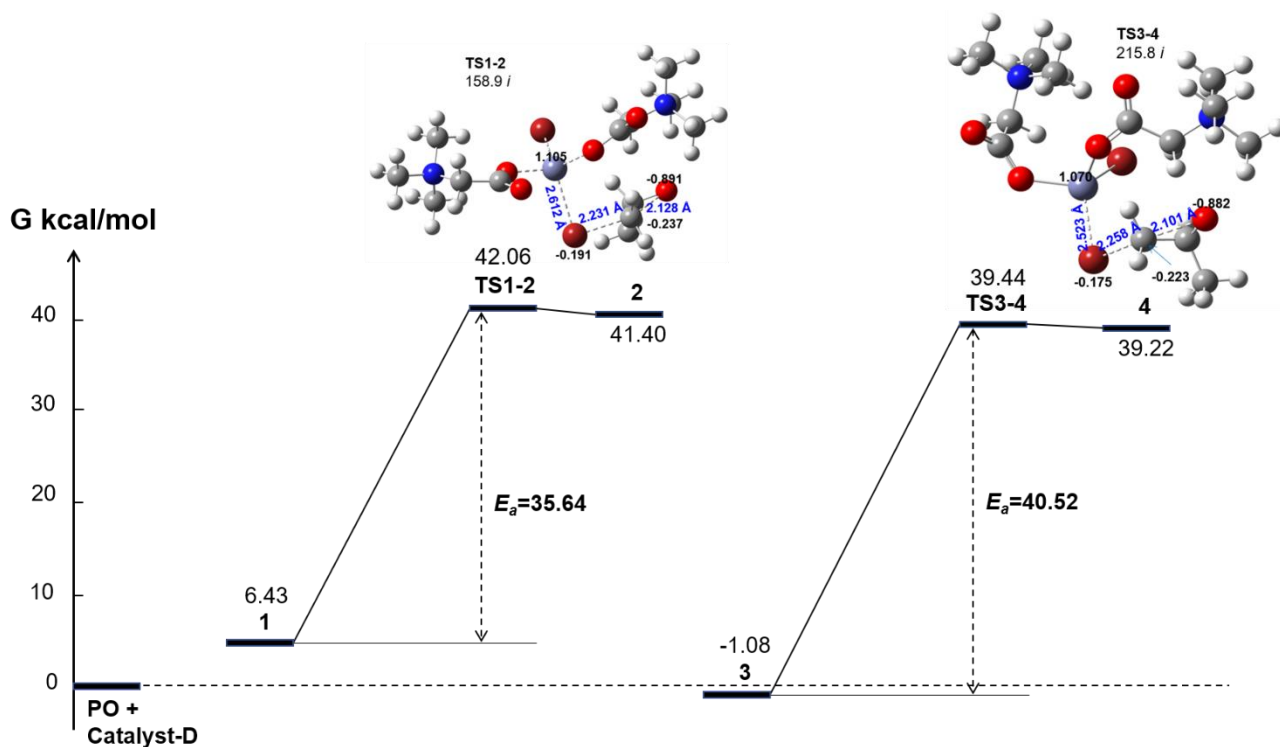

**Figure S3.** Relative free-energy profile of the Catalyst-D promoted ring opening step, via transition state TS1-2 and TS3-4 in gas. The atomic charges, the bond distances (in blue) and the imaginary vibrational frequencies ( $\text{cm}^{-1}$ ) are labeled in the corresponding positions.

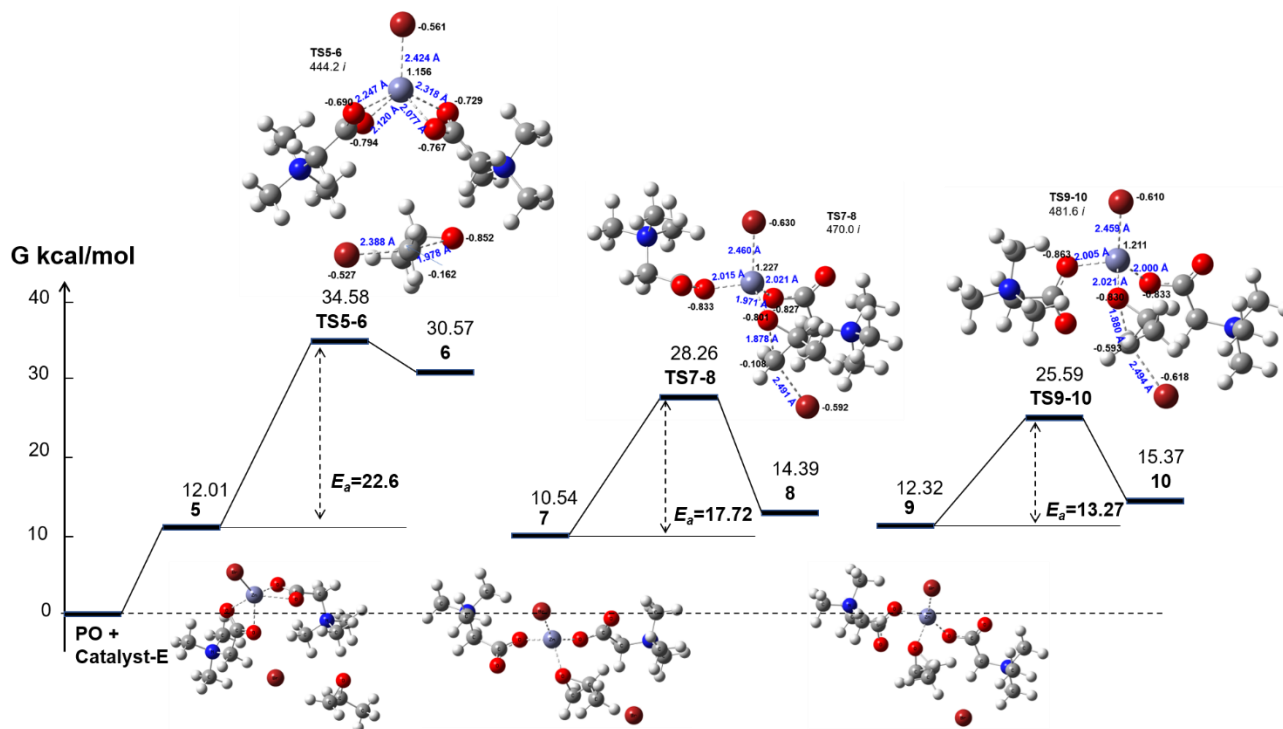

**Figure S4.** Relative free-energy profile of the Catalyst-E promoted ring opening steps, via transition state TS5-6, TS7-8 and 9-10 in gas. The atomic charges, the bond distances (in blue) and the imaginary vibrational frequencies ( $\text{cm}^{-1}$ ) are labeled in the corresponding positions.

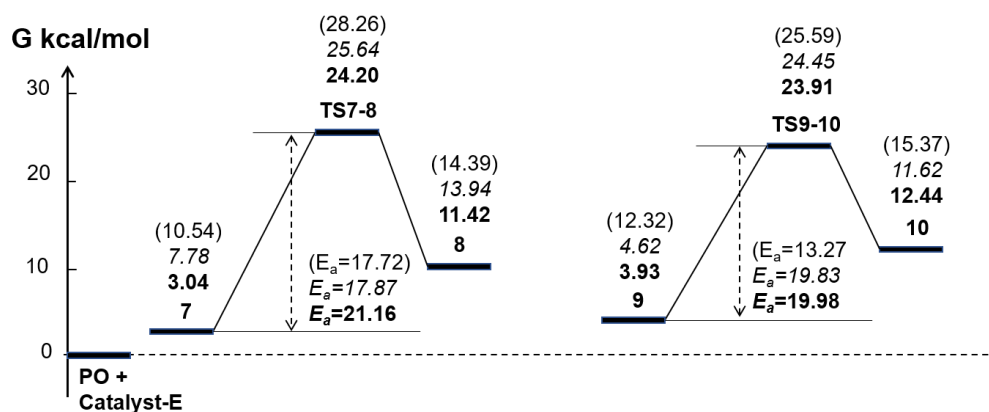

**Figure S5.** Relative free-energy profile of the Catalyst-E promoted ring opening steps, via transition state TS7-8 and 9-10 in gas (the numbers in brackets) with the solvent effects of PO (the numbers in italics) and PC (the bold numbers). The atomic charges (bold), the bond distances (in blue) and the imaginary vibrational frequencies ( $\text{cm}^{-1}$ ) are labeled in the corresponding positions.





### Catalyst-E

|    |             |             |             |
|----|-------------|-------------|-------------|
| N  | -0.26872246 | 0.81497796  | 0.00000000  |
| C  | 0.70853254  | -0.23206304 | 0.44875900  |
| H  | 0.57254554  | -0.37332804 | 1.52227300  |
| H  | 0.44923154  | -1.15757304 | -0.06956200 |
| C  | -0.13072346 | 1.09358196  | -1.46903500 |
| H  | -0.18720746 | 0.14142696  | -1.99620500 |
| H  | -0.95289846 | 1.74470096  | -1.75982600 |
| H  | 0.82523554  | 1.57747596  | -1.64071200 |
| C  | -0.09902746 | 2.08093496  | 0.77989600  |
| H  | -0.24852046 | 1.85783396  | 1.83491500  |
| H  | 0.90312354  | 2.46044696  | 0.60308600  |
| H  | -0.84756446 | 2.79259196  | 0.43630200  |
| C  | -1.64048446 | 0.26283796  | 0.24231000  |
| H  | -1.74102846 | 0.02375296  | 1.29934200  |
| H  | -2.36987846 | 1.01731396  | -0.04532500 |
| H  | -1.75685946 | -0.63343604 | -0.36587400 |
| C  | 2.17803154  | 0.04320796  | 0.17289700  |
| O  | 2.93850654  | -0.93867204 | 0.40866100  |
| O  | 2.59877054  | 1.12742796  | -0.26598400 |
| N  | 3.96984154  | -4.22891604 | -3.01449600 |
| C  | 3.78547754  | -2.77012304 | -3.31658200 |
| H  | 4.26133254  | -2.56709404 | -4.27773200 |
| H  | 2.71154454  | -2.59420804 | -3.40475800 |
| C  | 3.39624254  | -4.58008604 | -1.67143100 |
| H  | 2.37382454  | -4.20365304 | -1.63590900 |
| H  | 3.41081354  | -5.66447504 | -1.57904100 |
| H  | 4.00818254  | -4.11924304 | -0.90266200 |
| C  | 5.41414454  | -4.61724404 | -3.07201800 |
| H  | 5.79125854  | -4.39481004 | -4.06878400 |
| H  | 5.95189954  | -4.04910804 | -2.31850400 |
| H  | 5.48387254  | -5.68512504 | -2.87356200 |
| C  | 3.20941854  | -4.98817104 | -4.05940800 |
| H  | 3.57493454  | -4.69448704 | -5.04157000 |
| H  | 3.37321154  | -6.05140604 | -3.89720000 |
| H  | 2.15330854  | -4.74206904 | -3.95468400 |
| C  | 4.32013354  | -1.79088704 | -2.28476800 |
| O  | 5.07090554  | -2.13327004 | -1.34793300 |
| O  | 3.92126954  | -0.60457804 | -2.42968100 |
| Zn | 4.61282854  | -0.07480404 | -0.50480600 |
| Br | 0.16314254  | -2.65561704 | -2.33419900 |
| Br | 6.34128254  | 1.44083396  | 0.27816600  |

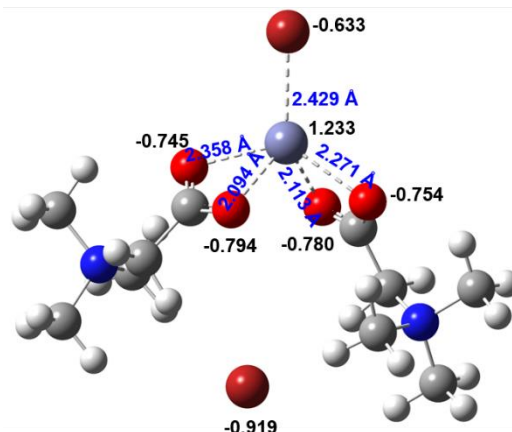

With the solvent effects of PC

**TS1-2**

|    |             |             |             |
|----|-------------|-------------|-------------|
| N  | -0.80321284 | 1.32530120  | 0.00000000  |
| C  | 0.09304016  | 0.62528020  | -0.98640800 |
| H  | 1.06900816  | 0.49311920  | -0.51238300 |
| H  | -0.35637584 | -0.35541780 | -1.12630200 |
| C  | -2.16797584 | 1.55078420  | -0.58985300 |
| H  | -2.53634284 | 0.57337720  | -0.91402700 |
| H  | -2.79877284 | 1.95981620  | 0.19982100  |
| H  | -2.07114484 | 2.25601920  | -1.41017800 |
| C  | -0.20899684 | 2.61649220  | 0.44918300  |
| H  | 0.76291116  | 2.40967120  | 0.89745600  |
| H  | -0.10313684 | 3.26590120  | -0.41561500 |
| H  | -0.87490284 | 3.05522520  | 1.19192200  |
| C  | -0.95734084 | 0.40013820  | 1.17077100  |
| H  | 0.03439716  | 0.17618520  | 1.56416300  |
| H  | -1.55640184 | 0.90914220  | 1.92610400  |
| H  | -1.46031584 | -0.50138480 | 0.80124000  |
| C  | 0.28312716  | 1.32298620  | -2.34445100 |
| O  | 0.82445216  | 0.56678920  | -3.22647000 |
| O  | -0.06027584 | 2.47885520  | -2.50651300 |
| N  | 4.73689416  | -3.90859980 | -4.66952600 |
| C  | 4.37876316  | -3.07127580 | -5.87934000 |
| H  | 5.27253916  | -2.50551580 | -6.15093900 |
| H  | 4.12599416  | -3.76261480 | -6.68232800 |
| C  | 3.50154316  | -4.51955080 | -4.07366100 |
| H  | 2.90981816  | -4.95790680 | -4.87741500 |
| H  | 3.81159416  | -5.28371280 | -3.36178000 |
| H  | 2.93791316  | -3.74839980 | -3.55558000 |
| C  | 5.45240016  | -3.10219880 | -3.62396200 |
| H  | 6.38816716  | -2.74772080 | -4.05613300 |
| H  | 4.81586916  | -2.27360680 | -3.32757600 |
| H  | 5.64700916  | -3.75503280 | -2.77349400 |
| C  | 5.64032016  | -5.00352680 | -5.12751700 |
| H  | 6.49547116  | -4.56350880 | -5.63896200 |
| H  | 5.97361916  | -5.56890080 | -4.25826200 |
| H  | 5.09100516  | -5.65241980 | -5.80814300 |
| C  | 3.18577516  | -2.10348280 | -5.68024200 |
| O  | 2.41910616  | -1.98993180 | -6.60737800 |
| O  | 3.18527316  | -1.52354580 | -4.53908800 |
| Zn | 1.69006316  | -1.15567680 | -3.31065300 |
| Br | -0.08154884 | -2.87768380 | -4.15958600 |
| Br | 2.72984116  | -1.94457380 | -1.20492600 |
| O  | -2.26723284 | -1.49367180 | -0.82969600 |
| C  | -1.44846284 | -2.44181180 | -1.37178400 |
| C  | -1.59254584 | -1.97011580 | -2.79137900 |
| H  | -0.38656284 | -2.37776380 | -1.05343300 |
| H  | -2.51587384 | -2.26734480 | -3.28121500 |
| H  | -1.31898584 | -0.93758280 | -2.97592900 |
| C  | -1.91510684 | -3.87901880 | -1.17345700 |
| H  | -1.89378684 | -4.11801980 | -0.10859800 |
| H  | -2.94668684 | -3.97525280 | -1.52283200 |
| H  | -1.27958584 | -4.58990280 | -1.70934000 |

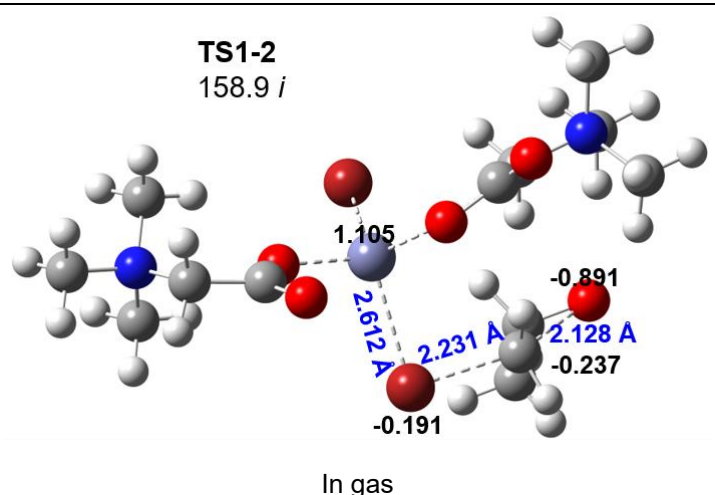

| TS3-4 |             |             |             |
|-------|-------------|-------------|-------------|
| N     | 0.33132530  | 1.36546184  | 0.00000000  |
| C     | 1.53175630  | 0.70032584  | -0.62337900 |
| H     | 2.31578230  | 0.63494584  | 0.13579200  |
| H     | 1.19191830  | -0.29856516 | -0.87866100 |
| C     | -0.74226970 | 1.51048584  | -1.03798000 |
| H     | -0.94472470 | 0.50805484  | -1.42610800 |
| H     | -1.62502870 | 1.92539184  | -0.55153600 |
| H     | -0.37995370 | 2.18930784  | -1.80791700 |
| C     | 0.66258630  | 2.69010784  | 0.60044700  |
| H     | 1.44007430  | 2.54015684  | 1.34956100  |
| H     | 1.01894730  | 3.35095784  | -0.18375000 |
| H     | -0.23899570 | 3.07788784  | 1.07424400  |
| C     | -0.17516270 | 0.44593884  | 1.07312500  |
| H     | 0.62108630  | 0.30537684  | 1.80407800  |
| H     | -1.03473770 | 0.92285984  | 1.54450100  |
| H     | -0.45438870 | -0.49720316 | 0.58658500  |
| C     | 2.10582030  | 1.40755984  | -1.86509100 |
| O     | 2.56802130  | 0.61765684  | -2.75096400 |
| O     | 2.11866930  | 2.63239584  | -1.92086400 |
| N     | 6.48575330  | 2.31580384  | -2.84974300 |
| C     | 6.70980930  | 0.90564984  | -3.34898300 |
| H     | 7.74464030  | 0.85115984  | -3.69167500 |
| H     | 6.56061630  | 0.24560784  | -2.49614900 |
| C     | 5.02547330  | 2.53825984  | -2.57559900 |
| H     | 4.71640230  | 1.81749384  | -1.82091900 |
| H     | 4.89190530  | 3.55350384  | -2.20549100 |
| H     | 4.45181730  | 2.39288184  | -3.48923100 |
| C     | 6.97425130  | 3.32830184  | -3.83586500 |
| H     | 8.03954130  | 3.16385984  | -3.99592600 |
| H     | 6.43595530  | 3.18875784  | -4.76962900 |
| H     | 6.80354030  | 4.31813884  | -3.41351600 |
| C     | 7.23642230  | 2.46660384  | -1.56891100 |
| H     | 8.29189030  | 2.27259184  | -1.75683800 |
| H     | 7.10053830  | 3.48334484  | -1.20145700 |
| H     | 6.84150430  | 1.74556584  | -0.85276100 |
| C     | 5.75825930  | 0.53808584  | -4.51776000 |
| O     | 5.81888930  | 1.21876184  | -5.52595300 |
| O     | 5.01888630  | -0.47515216 | -4.30217400 |
| Zn    | 3.81224830  | -0.93282616 | -2.82844000 |
| Br    | 2.52148830  | -2.96056516 | -3.59597200 |
| Br    | 4.87000830  | -0.85204816 | -0.58770700 |
| O     | -0.57673170 | -1.59185316 | -1.08691900 |
| C     | 0.44035830  | -2.48124316 | -1.29897300 |
| C     | 0.61194230  | -2.11350416 | -2.73893600 |
| H     | 1.37534630  | -2.26855916 | -0.73465100 |
| H     | -0.11738970 | -2.54616316 | -3.41780300 |
| H     | 0.84837930  | -1.07535716 | -2.93722400 |
| C     | 0.07430130  | -3.94208116 | -1.07735000 |
| H     | -0.16216570 | -4.09704316 | -0.02300900 |
| H     | -0.81525970 | -4.18584216 | -1.66396400 |
| H     | 0.89234730  | -4.61125516 | -1.35752000 |

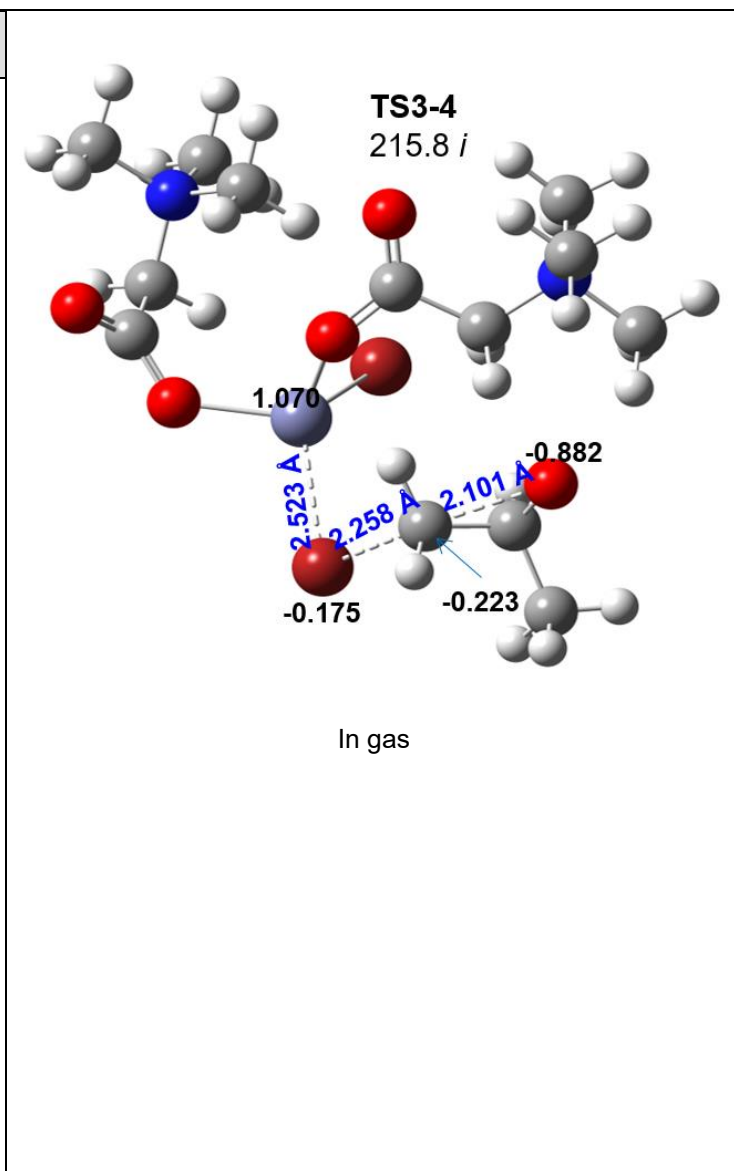

| TS5-6 |             |             |             |
|-------|-------------|-------------|-------------|
| N     | 0.41164658  | 1.36546184  | 0.00000000  |
| C     | -0.97469742 | 0.83132084  | -0.24993600 |
| H     | -0.94025642 | -0.23531316 | -0.00835600 |
| H     | -1.65096542 | 1.34106984  | 0.43873200  |
| C     | 0.44986058  | 2.84395984  | -0.19294400 |
| H     | -0.27068242 | 3.29998184  | 0.48589000  |
| H     | 1.45483558  | 3.19381784  | 0.04142200  |
| H     | 0.19485558  | 3.06157284  | -1.22771200 |
| C     | 1.42441358  | 0.70363784  | -0.89500400 |
| H     | 1.31947358  | -0.37268916 | -0.73896700 |
| H     | 1.21439058  | 0.99489684  | -1.91956500 |
| H     | 2.40800858  | 1.05330284  | -0.58043400 |
| C     | 0.75767158  | 1.02238084  | 1.41616200  |
| H     | 0.73911158  | -0.06660716 | 1.50411700  |
| H     | 1.74906358  | 1.42092584  | 1.63008300  |
| H     | 0.02094158  | 1.48271284  | 2.07406700  |
| C     | -1.50276142 | 0.99320884  | -1.66635800 |
| O     | -2.66209142 | 0.52309584  | -1.83201600 |
| O     | -0.83630942 | 1.51070784  | -2.57572700 |
| N     | -1.14630842 | -3.81738216 | -4.83451900 |
| C     | -2.44389942 | -3.26007416 | -4.30470200 |
| H     | -3.24309442 | -3.63223816 | -4.94632300 |
| H     | -2.58647542 | -3.67085016 | -3.29994400 |
| C     | 0.00610358  | -3.51211816 | -3.91812000 |
| H     | -0.20245942 | -3.97725116 | -2.95429200 |
| H     | 0.89992558  | -3.95045816 | -4.36186100 |
| H     | 0.09809858  | -2.43277316 | -3.83464100 |
| C     | -0.86590842 | -3.27171016 | -6.19728800 |
| H     | -1.72648742 | -3.47534516 | -6.83424200 |
| H     | -0.69771542 | -2.20080616 | -6.11232400 |
| H     | 0.01685358  | -3.77399616 | -6.59123000 |
| C     | -1.29948342 | -5.30489416 | -4.91386200 |
| H     | -2.10653142 | -5.53449216 | -5.60857400 |
| H     | -0.36189642 | -5.72671316 | -5.27420900 |
| H     | -1.52836542 | -5.67825616 | -3.91489700 |
| C     | -2.54297742 | -1.74083016 | -4.24399100 |
| O     | -1.50272842 | -1.02624616 | -4.30755200 |
| O     | -3.67915842 | -1.27422816 | -4.09239600 |
| Zn    | -2.68230942 | 0.70702884  | -3.86921100 |
| Br    | -1.84440842 | -5.19154616 | -1.17581000 |
| Br    | -3.33975042 | 2.34193184  | -5.43556100 |
| O     | 0.27556258  | -1.81797916 | 0.34200000  |
| C     | 0.37904258  | -3.16233316 | 0.02511600  |
| C     | -1.03596542 | -3.06221516 | -0.36308800 |
| H     | 1.04396458  | -3.37037416 | -0.82967200 |
| H     | -1.75883242 | -3.01655816 | 0.43949800  |
| H     | -1.27545542 | -2.52009016 | -1.26927700 |
| C     | 0.69597458  | -4.08470116 | 1.18373100  |
| H     | 0.60702458  | -5.13123116 | 0.88470800  |
| H     | 1.71195258  | -3.89469916 | 1.53731000  |
| H     | 0.00165658  | -3.88933116 | 2.00448600  |

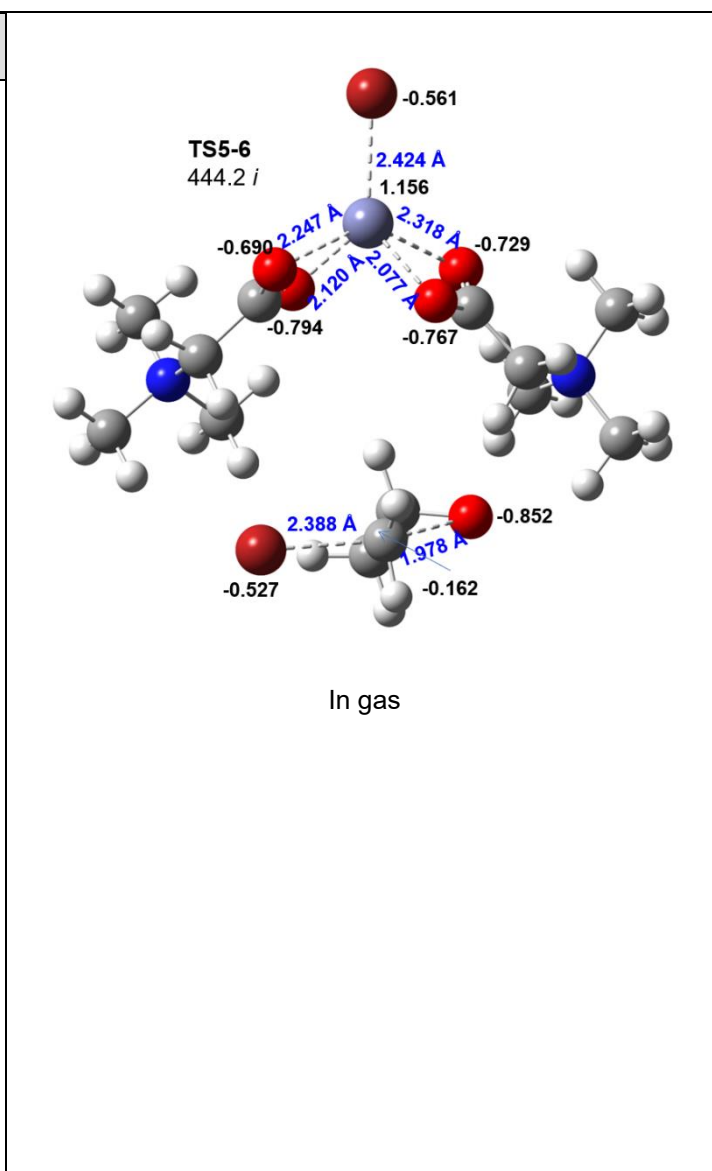



| TS9-10 |             |             |             |
|--------|-------------|-------------|-------------|
| N      | -0.69277107 | 0.80321285  | 0.00000000  |
| C      | -1.89004607 | -0.06143015 | -0.31194300 |
| H      | -2.21487907 | -0.49819715 | 0.63012000  |
| H      | -2.66800607 | 0.59334985  | -0.70627900 |
| C      | -0.32689807 | 1.70333185  | -1.14280400 |
| H      | -1.19447807 | 2.31360685  | -1.38762400 |
| H      | 0.49665893  | 2.33432885  | -0.81396500 |
| H      | -0.03972507 | 1.09564485  | -1.99450400 |
| C      | 0.47824493  | -0.06295715 | 0.34935800  |
| H      | 0.18506193  | -0.71831615 | 1.16863900  |
| H      | 0.76881493  | -0.64777415 | -0.52491100 |
| H      | 1.29693293  | 0.58313485  | 0.66099500  |
| C      | -1.04312007 | 1.65908685  | 1.17774600  |
| H      | -1.25970307 | 1.01467685  | 2.02692300  |
| H      | -0.19505907 | 2.30368085  | 1.39974400  |
| H      | -1.91582207 | 2.25725085  | 0.92218200  |
| C      | -1.57959907 | -1.18892215 | -1.31210200 |
| O      | -1.76270707 | -2.34494115 | -2.95477700 |
| O      | -1.16101807 | -0.78463515 | -2.44837000 |
| N      | 0.92669493  | -7.04382515 | -4.47294400 |
| C      | 0.03183593  | -5.93687615 | -3.99310300 |
| H      | -0.99192407 | -6.19823515 | -4.26552300 |
| H      | 0.10656093  | -5.92321315 | -2.90376100 |
| C      | 2.36020093  | -6.76142515 | -4.13223800 |
| H      | 2.42158893  | -6.58159615 | -3.05836800 |
| H      | 2.94671093  | -7.63758615 | -4.40318800 |
| H      | 2.68397593  | -5.89240515 | -4.69611000 |
| C      | 0.77946193  | -7.25485115 | -5.94730600 |
| H      | -0.26431207 | -7.48347015 | -6.15685100 |
| H      | 1.08695993  | -6.34625015 | -6.45592000 |
| H      | 1.41093693  | -8.09378215 | -6.23314600 |
| C      | 0.51272493  | -8.29181115 | -3.75386700 |
| H      | -0.53172207 | -8.49649915 | -3.98141900 |
| H      | 1.14133793  | -9.11075515 | -4.09795300 |
| H      | 0.64832093  | -8.12960115 | -2.68505100 |
| C      | 0.33622193  | -4.52386715 | -4.50975700 |
| O      | 1.18043293  | -4.30746815 | -5.37073900 |
| O      | -0.38668007 | -3.66760615 | -3.90111000 |
| Zn     | 0.18733193  | -1.77901315 | -3.54530200 |
| Br     | 1.36969593  | -6.07299515 | -0.36740900 |
| Br     | 1.11971993  | -0.11648015 | -5.13320300 |
| O      | 1.49632093  | -2.14137815 | -2.05513200 |
| C      | 2.19955393  | -3.36431215 | -1.97695400 |
| C      | 1.08194293  | -3.71202215 | -1.09944900 |
| H      | 2.22290693  | -3.91515215 | -2.92236900 |
| H      | 0.11759493  | -3.92959715 | -1.53255600 |
| H      | 1.11091793  | -3.33353815 | -0.08653400 |
| C      | 3.57194093  | -3.24693915 | -1.36328400 |
| H      | 4.00238093  | -4.23814015 | -1.20730300 |
| H      | 4.22657893  | -2.67881815 | -2.02699900 |
| H      | 3.50848293  | -2.72991515 | -0.40277400 |

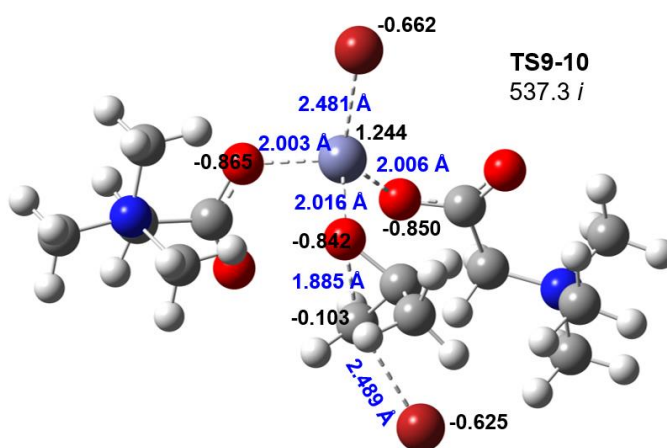

With the solvent effects of PC

### TS11-12

|    |             |             |             |
|----|-------------|-------------|-------------|
| N  | 0.11044177  | 1.06425703  | 0.00000000  |
| C  | 1.36668777  | 1.73192703  | -0.49040000 |
| H  | 1.06877877  | 2.51632803  | -1.18982900 |
| H  | 1.83344477  | 2.19164603  | 0.37778400  |
| C  | 0.45652977  | -0.14923697 | 0.80840800  |
| H  | 1.16818977  | 0.14977603  | 1.57791600  |
| H  | -0.45969223 | -0.53004097 | 1.25588500  |
| H  | 0.90501177  | -0.88792597 | 0.15085600  |
| C  | -0.79352423 | 0.68594003  | -1.13212600 |
| H  | -1.06015823 | 1.59219803  | -1.67339000 |
| H  | -0.25901923 | -0.00346997 | -1.77775900 |
| H  | -1.68508123 | 0.22368903  | -0.71236200 |
| C  | -0.59881723 | 2.04037103  | 0.88637800  |
| H  | -0.80863423 | 2.94292103  | 0.31552300  |
| H  | -1.52641423 | 1.58540903  | 1.22830200  |
| H  | 0.04755677  | 2.26835203  | 1.73275600  |
| C  | 2.38299077  | 0.81245603  | -1.19237700 |
| O  | 3.59173477  | 1.17626403  | -1.02451100 |
| O  | 1.99573477  | -0.12340397 | -1.88327000 |
| N  | 9.32169977  | 4.27820503  | 0.39948800  |
| C  | 8.03180377  | 3.86945403  | -0.25268900 |
| H  | 7.52277177  | 4.77975303  | -0.57230700 |
| H  | 8.28815777  | 3.28823403  | -1.13984300 |
| C  | 10.11425577 | 3.07533603  | 0.81600400  |
| H  | 10.24733477 | 2.43672003  | -0.05603300 |
| H  | 11.07844477 | 3.41988603  | 1.18505800  |
| H  | 9.56604177  | 2.55297303  | 1.59353300  |
| C  | 9.07410077  | 5.16427403  | 1.58263600  |
| H  | 8.49062377  | 6.02123403  | 1.25073600  |
| H  | 8.53408977  | 4.59569503  | 2.33244900  |
| H  | 10.03874277 | 5.49403703  | 1.96332800  |
| C  | 10.11488877 | 5.04527603  | -0.61378900 |
| H  | 9.53834277  | 5.91572103  | -0.92052300 |
| H  | 11.05078877 | 5.35579403  | -0.15371200 |
| H  | 10.30991377 | 4.39927103  | -1.46755300 |
| C  | 7.06387777  | 3.03680103  | 0.59863400  |
| O  | 7.29538877  | 2.76246003  | 1.77130800  |
| O  | 6.04639477  | 2.69162403  | -0.08356800 |
| Zn | 4.71130577  | 1.37957903  | 0.64909200  |
| Br | 8.79583177  | 0.36103203  | -1.94358700 |
| Br | 3.36865977  | 2.04322003  | 2.65384800  |
| O  | 5.64328577  | -0.35454497 | 0.68235700  |
| C  | 6.97079677  | -0.39440897 | 0.21662100  |
| C  | 6.96378177  | -0.15193597 | -1.29416300 |
| H  | 7.53220377  | 0.42863103  | 0.68039200  |
| H  | 6.69723177  | -1.03467597 | -1.86793500 |
| H  | 6.34162577  | 0.69778903  | -1.56033700 |
| C  | 7.64331277  | -1.70886997 | 0.59167700  |
| H  | 8.68675777  | -1.72058997 | 0.26895800  |
| H  | 7.61592777  | -1.83617297 | 1.67520400  |
| H  | 7.12142477  | -2.54680697 | 0.12565400  |
| C  | 4.26705077  | -1.64678097 | 0.04983300  |
| O  | 4.79300477  | -2.25261697 | -0.80786100 |
| O  | 3.38851477  | -1.34637697 | 0.77156100  |

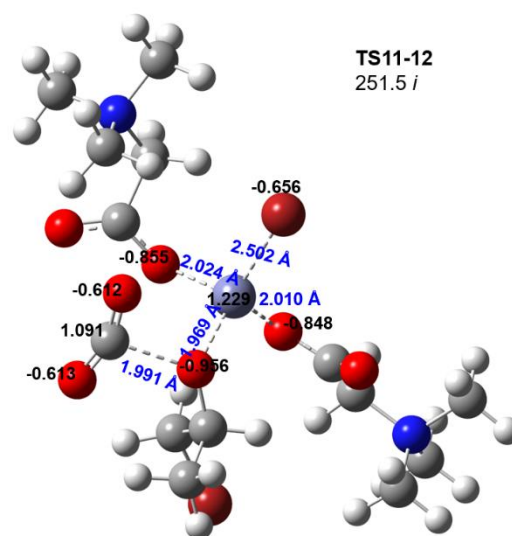

TS11-12  
251.5 i

With the solvent effects of PC

TS12-13

|    |             |             |             |
|----|-------------|-------------|-------------|
| N  | 0.45180722  | 2.34939758  | 0.00000000  |
| C  | 1.33235822  | 3.56693058  | -0.13657800 |
| H  | 0.67605822  | 4.41900058  | -0.31686800 |
| H  | 1.84121322  | 3.69077458  | 0.81692100  |
| C  | 1.28250622  | 1.10399858  | -0.02986500 |
| H  | 2.03735722  | 1.17523458  | 0.75282200  |
| H  | 0.62815322  | 0.25398558  | 0.15359900  |
| H  | 1.74422922  | 1.01496958  | -1.01153700 |
| C  | -0.57759778 | 2.29399258  | -1.08747600 |
| H  | -1.19642878 | 3.18680058  | -1.01680200 |
| H  | -0.06708278 | 2.26231158  | -2.04508900 |
| H  | -1.18177078 | 1.40233758  | -0.93203600 |
| C  | -0.24167578 | 2.43402558  | 1.32499000  |
| H  | -0.79913578 | 3.36790058  | 1.36453900  |
| H  | -0.91739078 | 1.58558058  | 1.41441400  |
| H  | 0.51392622  | 2.40639658  | 2.10909500  |
| C  | 2.34639722  | 3.44929458  | -1.29361700 |
| O  | 3.57602922  | 3.51422658  | -0.96925900 |
| O  | 1.91415722  | 3.33341258  | -2.43544500 |
| N  | 9.63379022  | 5.29377058  | 0.97382800  |
| C  | 8.59805222  | 4.51996958  | 0.20718200  |
| H  | 8.44624922  | 5.03186558  | -0.74263500 |
| H  | 9.03480022  | 3.53945658  | -0.00066500 |
| C  | 10.06098122 | 4.55783158  | 2.20877000  |
| H  | 10.49171722 | 3.60576658  | 1.89867400  |
| H  | 10.81565822 | 5.16001258  | 2.71164500  |
| H  | 9.19218422  | 4.41472458  | 2.84334000  |
| C  | 9.12221722  | 6.65327858  | 1.33690400  |
| H  | 8.77247422  | 7.14062158  | 0.42816000  |
| H  | 8.31271022  | 6.53813758  | 2.05053400  |
| H  | 9.94442222  | 7.21749158  | 1.77255900  |
| C  | 10.82960922 | 5.44590258  | 0.08234100  |
| H  | 10.54151322 | 6.02412658  | -0.79356800 |
| H  | 11.60644622 | 5.96632858  | 0.63923900  |
| H  | 11.17055822 | 4.45227758  | -0.20662800 |
| C  | 7.23344922  | 4.32199658  | 0.88831800  |
| O  | 7.06949922  | 4.56489758  | 2.07739800  |
| O  | 6.37369722  | 3.87412058  | 0.06254300  |
| Zn | 4.66846322  | 2.97616258  | 0.61289900  |
| Br | 11.31263422 | 1.41402758  | 0.08316300  |
| Br | 3.58761422  | 2.74044058  | 2.83689300  |
| O  | 7.16026922  | 1.27983958  | 1.16651700  |
| C  | 8.53354922  | 0.85481558  | 1.19975500  |
| C  | 9.00287022  | 0.67819358  | -0.23766400 |
| H  | 9.05843522  | 1.68060158  | 1.67299300  |
| H  | 9.38241822  | -0.26940742 | -0.58178500 |
| H  | 8.88555522  | 1.47063758  | -0.95987900 |
| C  | 8.68398822  | -0.41616942 | 2.01109700  |
| H  | 9.74038422  | -0.68161742 | 2.07692100  |
| H  | 8.29359122  | -0.26337942 | 3.01702700  |
| H  | 8.14114422  | -1.23500042 | 1.53444400  |
| C  | 6.49219422  | 0.79701358  | 0.09497800  |
| O  | 7.16738322  | 0.09693258  | -0.69455600 |
| O  | 5.28939822  | 1.11030958  | -0.00673000 |

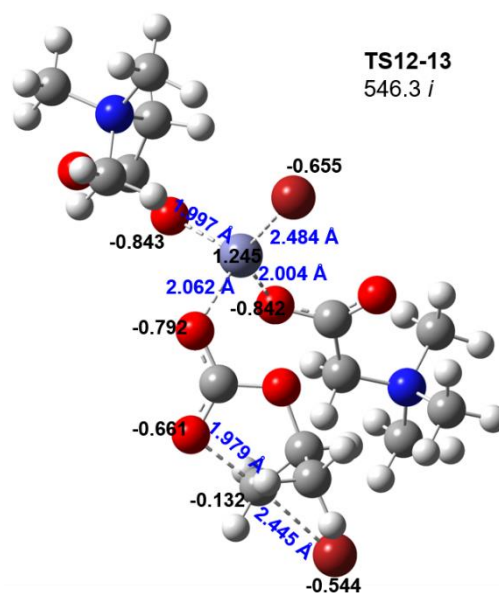

With the solvent effects of PC
